# Supplementary material
Source: Springer Nature journal article supplement (https://www.springermedizin.de/resource/supplementary/13018_2011_330_MOESM2_ESM.pdf/9636774)

**A**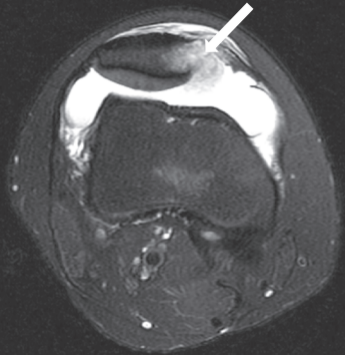**B**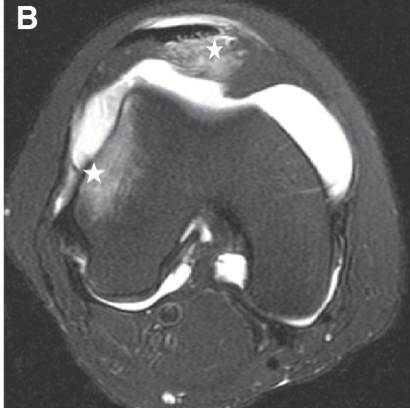

Supplement: MOESM2 [file 9636774]
